# Supplementary material for: Microtubule-dependent ribosome localization in C. elegans neurons
Source: eLife. 2017 Aug 2;6:e26376. doi: 10.7554/eLife.26376 (PMC5577916; doi:10.7554/eLife.26376)
Supplement: Supplementary file 1. [file elife-26376-supp1.xlsx]

## Sheet: Strain list
	Supplementary file 1 Strain list
	Strain #	Genotype	Description	Plasmid	Figure
	CZ18018	juSi94[gfp11::rps-18 + Cb-unc-119(+)]II; rps-18(ok3353)IV; juEx5375[Pcol-19-gfp1-10 + Pttx-3-rfp]	Epidermis-specific Pcol-19-RIBOs	pCZGY3172	1C, 1E, 1F, 1G, 1H
	CZ18423	juEx5375[Pcol-19-gfp1-10 + Pttx-3-rfp]	Epidermis-specific Pcol-19-RIBOs, negative control	pCZGY3172	1C
	CZ18550	juSi123[rpl-29::gfp]II; rpl-29(tm3555)IV		pCZGY3177	1F, 1G, 1H, 1-S2C
	CZ19244	juEx5809[Pcol-19-ife-2::gfp + Pttx-3-rfp]	Initiation facotor in epidermis	pCZGY3170	1D, 1F, 1G, 1H
	CZ19246	juEx5811[Pcol-19-ife-4::gfp + Pttx-3-rfp]	Initiation facotor in epidermis	pCZGY3171	1F, 1G, 1H
	CZ19297	juSi94[gfp11::rps-18]II; rps-18(ok3353) juIs409[Prgef-1-gfp1-10 + Pttx-3-rfp]IV	Pan-neuron-specific Prgef-1-RIBOs	pCZGY3196	2A, 2B
	CZ18719	juEx5604[Prgef-1-ife-2::gfp + Prgef-1-mcherry::rab-3 + Pttx-3-rfp]	Initiation facotor in neurons	pCZGY3184, pCZGY3188	2C
	CZ18720	juEx5605[Prgef-1-ife-4::gfp + Prgef-1-mcherry::rab-3 + Pttx-3-rfp]	Initiation facotor in neurons	pCZGY3185, pCZGY3188	2C
	CZ18721	juEx5606[Prgef-1-stau-1::gfp + Prgef-1-mcherry::rab-3 + Pttx-3-rfp]	RNA granules in neurons	pCZGY3186, pCZGY3188	2C
	CZ18722	juEx5607[Prgef-1-ain-1::gfp + Prgef-1-mcherry::rab-3 + Pttx-3-rfp	RNA granules in neurons	pCZGY3187, pCZGY3188	2C
	CZ18412	juSi94[Prps-18-gfp11::rps-18 + Cb-unc-119(+)]II; rps-18(ok3353)IV; glo-4(ok623)V; juEx5515[Punc-25-gfp1-10 + Punc-25-mcherry::rab-3 + Pttx-3-rfp]	GABAergic motor neuron-specific Punc-25-RIBOs	pCZGY3195, pCZGY404	3A
	CZ20132	juSi94[Prps-18-gfp11::rps-18 + Cb-unc-119(+)]II; rps-18(ok3353)IV; juIs463[Pflp-13-GFP1-10]	DD motor neuron-specific Pflp-13-RIBOs		3B
	N2	wt			3B, 3C, 3D, 3E, 3F, 3G
	CZ19189	juIs438[Pmec-4-gfp1-10 + Pmec-4-tagrfp + Pttx-3-rfp]II	Mechanosensory neuron-specific Pmec-4-RIBOs negative control. Integration of CZ18950	pCZGY3174, pCZGY2333	4, 5A, 5B
	CZ19299	juSi94[gfp11::rps-18 + Cb-unc-119(+)] juIs438[Pmec-4-gfp1-10 + Pmec-4-tagrfp + Pttx-3-rfp]II; rps-18(ok3353)IV	Mechanosensory neuron-specific Pmec-4-RIBOs	pCZGY3174, pCZGY2333	4, 5A, 5B, 6, 7F, 7-S2B
	CZ19846	juSi94[gfp11::rps-18 + Cb-unc-119(+)] juIs438[Pmec-4-gfp1-10 + Pmec-4-tagrfp + Pttx-3-rfp]II; unc-44(e362) rps-18(ok3353)IV	Pmec-4-RIBOs in unc-44(e362)		6
	CZ19847	juSi94[gfp11::rps-18 + Cb-unc-119(+)] juIs438[Pmec-4-gfp1-10 + Pmec-4-tagrfp + Pttx-3-rfp]II; rps-18(ok3353)IV; unc-70(e524)V	Pmec-4-RIBOs in unc-70(e524)		6
	CZ19447	juSi94[gfp11::rps-18 + Cb-unc-119(+)] juIs438[Pmec-4-gfp1-10 + Pmec-4-tagrfp + Pttx-3-rfp]II; unc-16(e109)III; rps-18(ok3353)IV	Pmec-4-RIBOs in unc-16(e109)		6
	CZ19699	juSi94[gfp11::rps-18 + Cb-unc-119(+)] juIs438[Pmec-4-gfp1-10 + Pmec-4-tagrfp + Pttx-3-rfp]II; unc-16(ju79)III; rps-18(ok3353)IV	Pmec-4-RIBOs in unc-16(ju79)		6
	CZ19700	juSi94[gfp11::rps-18 + Cb-unc-119(+)] juIs438[Pmec-4-gfp1-10 + Pmec-4-tagrfp + Pttx-3-rfp]II; unc-16(ju146)III; rps-18(ok3353)IV	Pmec-4-RIBOs in unc-16(ju146)		6
	CZ19298	juSi94[gfp11::rps-18 + Cb-unc-119(+)] juIs438[Pmec-4-gfp1-10 + Pmec-4-tagrfp + Pttx-3-rfp]II; rps-18(ok3353)IV, glo-4(ok623)V	Pmec-4-RIBOs in glo-4		7A, 7B, 7-S2A
	CZ22332	juSi94[gfp11::rps-18 + Cb-unc-119(+)] juIs438[Pmec-4-gfp1-10 + Pmec-4-tagrfp + Pttx-3-rfp]II; rps-18(ok3353)IV, glo-4(ok623)V, mec-7(ju1286)X	Pmec-4-RIBOs in glo-4 and mec-7(ju1286)		7B
	CZ22333	juSi94[gfp11::rps-18 + Cb-unc-119(+)] juIs438[Pmec-4-gfp1-10 + Pmec-4-tagrfp + Pttx-3-rfp]II; rps-18(ok3353)IV, glo-4(ok623)V, mec-7(ju1287)X	Pmec-4-RIBOs in glo-4 and mec-7(ju1287)		7A, 7B
	CZ22334	juSi94[gfp11::rps-18 + Cb-unc-119(+)] mec-15(ju1288) juIs438[Pmec-4-gfp1-10 + Pmec-4-tagrfp + Pttx-3-rfp]II; rps-18(ok3353)IV, glo-4(ok623)V	Pmec-4-RIBOs in glo-4 and mec-15(ju1288)		7A, 7B
	CZ22335	juSi94[gfp11::rps-18 + Cb-unc-119(+)] mec-15(ju1289) juIs438[Pmec-4-gfp1-10 + Pmec-4-tagrfp + Pttx-3-rfp]II; rps-18(ok3353)IV, glo-4(ok623)V	Pmec-4-RIBOs in glo-4 and mec-15(ju1289)		7A, 7B
	CZ22391	juSi94[gfp11::rps-18 + Cb-unc-119(+)] juIs438[Pmec-4-gfp1-10 + Pmec-4-tagrfp + Pttx-3-rfp]II; rps-18(ok3353)IV, glo-4(ok623)V, mec-7(ju1294)X	Pmec-4-RIBOs in glo-4 and mec-7(ju1294)		7B
	CZ22392	juSi94[gfp11::rps-18 + Cb-unc-119(+)] juIs438[Pmec-4-gfp1-10 + Pmec-4-tagrfp + Pttx-3-rfp]II; mec-12(ju1295)III; rps-18(ok3353)IV, glo-4(ok623)V	Pmec-4-RIBOs in glo-4 and mec-12(ju1295)		7B
	CZ22394	juSi94[gfp11::rps-18 + Cb-unc-119(+)] juIs438[Pmec-4-gfp1-10 + Pmec-4-tagrfp + Pttx-3-rfp]II; rps-18(ok3353)IV, glo-4(ok623)V, mec-7(ju1297)X	Pmec-4-RIBOs in glo-4 and mec-7(ju1297)		7B
	CZ22395	juSi94[gfp11::rps-18 + Cb-unc-119(+)] juIs438[Pmec-4-gfp1-10 + Pmec-4-tagrfp + Pttx-3-rfp]II; rps-18(ok3353)IV, glo-4(ok623)V, mec-7(ju1298)X	Pmec-4-RIBOs in glo-4 and mec-7(ju1298)		7B
	CZ23432	juSi94[gfp11::rps-18 + Cb-unc-119(+)] juIs438[Pmec-4-gfp1-10 + Pmec-4-tagrfp + Pttx-3-rfp]II; rps-18(ok3353)IV, mec-7(u443)X	Pmec-4-RIBOs in mec-7(u443)		7D
	CZ23429	juSi94[gfp11::rps-18 + Cb-unc-119(+)] juIs438[Pmec-4-gfp1-10 + Pmec-4-tagrfp + Pttx-3-rfp]II; mec-12(e1607)III; rps-18(ok3353)IV	Pmec-4-RIBOs in mec-12(e1607)		7D
	CZ23980	juSi94[gfp11::rps-18 + Cb-unc-119(+)] juIs438[Pmec-4-gfp1-10 + Pmec-4-tagrfp + Pttx-3-rfp]II; mec-12(e1605)III; rps-18(ok3353)IV	Pmec-4-RIBOs in mec-12(e1605)		7D
	CZ23613	juSi94[gfp11::rps-18 + Cb-unc-119(+)] juIs438[Pmec-4-gfp1-10 + Pmec-4-tagrfp + Pttx-3-rfp]II; mec-17(ok2109) rps-18(ok3353)IV	Pmec-4-RIBOs in mec-17(ok2109)		7D
	CZ23501	juSi94[gfp11::rps-18 + Cb-unc-119(+)] juIs438[Pmec-4-gfp1-10 + Pmec-4-tagrfp + Pttx-3-rfp]II; rps-18(ok3353)IV, mec-2(e75)X	Pmec-4-RIBOs in mec-2(e75)		7D
	CZ22952	juSi94[gfp11::rps-18 + Cb-unc-119(+)] juIs438[Pmec-4-gfp1-10 + Pmec-4-tagrfp + Pttx-3-rfp]II; rps-18(ok3353)IV, mec-4(e1339)X	Pmec-4-RIBOs in mec-4(e1339)		7D
	CZ22578	juSi94[gfp11::rps-18 + Cb-unc-119(+)] juIs438[Pmec-4-gfp1-10 + Pmec-4-tagrfp + Pttx-3-rfp]II; rps-18(ok3353)IV, mec-7(ju1287)X	Pmec-4-RIBOs in mec-7(ju1287)		7-S2B
	CZ19250	muIs32[Pmec-7-gfp] II; juEx5815[Pmec-4-rps-18 + Pttx-3-rfp]	RPS-18 overexpression in mechanosensory neurons	pCZGY3175	1-S1A
	CZ18637	juSi83[gfp::rps-18 + Cb-unc-119(+)]II; rps-18(ok3353)IV/nT1 IV;V	GFP-tagged genomic rps-18	pCZGY3178	1-S1B, 1-S1C, 1-S1D, 1-S1E
	CZ16275	juSi83[gfp::rps-18 + Cb-unc-119(+)]II		pCZGY3178	1-S1C, 1-S1D, 1-S1E
	CZ17515	juSi94[gfp11::rps-18 + Cb-unc-119(+)]II; rps-18(ok3353)IV		pCZ946	1-S1C
	CZ17975	juEx5243[Prgef-1-rpl-29::gfp + Pttx-3-rfp]		pCZGY3176	1-S2A
	CZ18020	juSi94[gfp11::rps-18 + Cb-unc-119(+)]II; rps-18(ok3353)IV; juEx5377[Pmyo-3-gfp1-10 + Pttx-3-rfp]	Muscle-specific Pmyo-3-RIBOs	pCZGY3173	1-S3A
	CZ10969	muIs32[Pmec-7-gfp] II			5-S1A, 5-S1C
	CZ10175	zdIs5[Pmec-4-gfp]I			5-S1B
	CZ18950	juEx5700[Pmec-4-gfp1-10 + Pmec-4-tagrfp + Pttx-3-rfp]		pCZGY3174, pCZGY2333
	CZ16143	juEx4586[Prgef-1-GFP1-10]		pCZGY3196
	CZ23979	juSi94[gfp11::rps-18 + Cb-unc-119(+)] juIs438[Pmec-4-gfp1-10 + Pmec-4-tagrfp + Pttx-3-rfp]II; rps-18(ok3353)IV; elp-1(ok347)V	Pmec-4-RIBOs in elp-1(ok347)
