# Supplementary material for: Microtubule-dependent ribosome localization in C. elegans neurons
Source: eLife. 2017 Aug 2;6:e26376. doi: 10.7554/eLife.26376 (PMC5577916; doi:10.7554/eLife.26376)
Supplement: Supplementary file 2. [file elife-26376-supp2.xlsx]

## Sheet: Plasmid
	Table S2 Plasmid list
	Plasmid #	Description	Construction	Vector type	Transgene
	pCZGY3160	rps-18(gDNA)	YJ7758-YJ7759 PCR fragment from N2 lysis	Gateway ENTR vector (pCR8)
	pCZGY3161	rps-18(gDNA) with BglII and PstI site at the N-terminus	pCZGY3160 was modified using PCR with YJ12114 and YJ12115	Gateway ENTR vector (pCR8)
	pCZGY3162	gfp::rps-18(gDNA)	gfp was inserted into pCZGY3136 using BglII and PstI sites	Gateway ENTR vector (pCR8)
	pCZGY2254	gfp1-10	YJ9801-YJ9803 PCR fragment from MVC3	Gateway ENTR vector (pCR8)
	pCZGY3163	gfp11::rps-18	gfp11 from MVC2 was inserted into pCZGY3161 using BglII and PstI sites	Gateway ENTR vector (pCR8)
	pCZGY3192	BsiWI-gfp11::rps-18-AvrII	YJ12124-YJ12125 PCR fragment from pCZGY3163	Gateway ENTR vector (pCR8)
	pCZGY3164	rpl-18(CDS)	YJ12121-YJ12122 PCR fragment from N2 lysis	Gateway ENTR vector (pCR8)
	pCZGY3165	rpl-29(gDNA)	YJ9227-YJ9228 PCR fragment from N2 lysis	Gateway ENTR vector (pCR8)
	pCZGY3166	rpl-29(cDNA)	YJ12116-YJ12117 PCR fragment from N2 cDNA	Gateway ENTR vector (pCR8)
	pCZGY3167	rpl-29::gfp	gfp was inserted into pCZGY3165 using Gibson assembly	Gateway ENTR vector (pCR8)
	pCZGY3168	ife-2(cDNA)	YJ12118-YJ12119 PCR fragment from N2 cDNA	Gateway ENTR vector (pCR8)
	pCZGY3169	ife-4(cDNA)	YJ12120-YJ12121 PCR fragment from N2 cDNA	Gateway ENTR vector (pCR8)
	pCZGY3193	stau-1(cDNA)	YJ12128-YJ12129 PCR fragment from N2 cDNA	Gateway ENTR vector (pCR8)
	pCZGY3194	ain-1(cDNA)	YJ12130-YJ12131 PCR fragment from N2 cDNA	Gateway ENTR vector (pCR8)
	pCZGY404	mcherry::rab-3		Gateway ENTR vector (pCR8)
	pCZGY2230	tagrfp		Gateway ENTR vector (pCR8)
	pCZGY1030	pCFJ150-GTW	pCFJ150 with a Gateway cassette	Gateway DEST vector
	pCZGY1434	Pcol-19-GTW-3'UTR(unc-54)	665-bp col-19 promoter in DEST vector	Gateway DEST vector
	pCZGY1583	Pcol-19-GTW-gfp-3'UTR(unc-54)	665-bp col-19 promoter in gfp DEST vector	Gateway DEST vector
	pCZGY925	Pmyo-3-GTW-3'UTR(unc-54)	2388-bp myo-3 promoter in DEST vector	Gateway DEST vector
	pCZGY66	Prgef-1-GTW-3'UTR(unc-54)	3466-bp rgef-1 promoter in DEST vector	Gateway DEST vector
	pCZGY51	Prgef-1-GTW-gfp-3'UTR(unc-54)	3466-bp rgef-1 promoter in gfp DEST vector	Gateway DEST vector
	pCZGY553	Pmec-4-GTW-3'UTR(unc-54)	1025-bp mec-4 promoter in DEST vector	Gateway DEST vector
	pCZGY80	Punc-25-GTW-3'UTR(unc-54)	1254-bp unc-25 promoter in DEST vector	Gateway DEST vector
	pCZGY3190	Pmec-4-tagrfp-GTW-3'UTR(let-858)	1028-bp mec-4 promoter in DEST vector	Gateway DEST vector
		Pttx-3-rfp	Co-injection marker	Expression vector
	pCZGY3170	Pcol-19-ife-2::gfp	LR: pCZGY1583 + pCZGY3168	Expression vector	juEx5809
	pCZGY3171	Pcol-19-ife-4::gfp	LR: pCZGY1583 + pCZGY3168	Expression vector	juEx5811
	pCZGY3172	Pcol-19-gfp1-10	LR: pCZGY1434 + pCZGY2254	Expression vector	juEx5375
	pCZGY3173	Pmyo-3-gfp1-10	LR: pCZGY925 + pCZGY2254	Expression vector	juEx5377
	pCZGY3176	Prgef-1-rpl-29::gfp	LR: pCZGY51 + pCZGY3166	Expression vector	juEx5243
	pCZGY3196	Prgef-1-gfp1-10	LR: pCZGY66 + pCZGY2254	Expression vector	juEx4586, juIs409
	pCZGY3184	Prgef-1-ife-2(cDNA)::GFP	LR: pCZGY51 + pCZGY3168	Expression vector	juEx5604
	pCZGY3185	Prgef-1-ife-4(cDNA)::GFP	LR: pCZGY51 + pCZGY3169	Expression vector	juEx5605
	pCZGY3186	Prgef-1-stau-1(cDNA)::GFP	LR: pCZGY51 + pCZGY3193	Expression vector	juEx5606
	pCZGY3187	Prgef-1-ain-1(cDNA)::GFP	LR: pCZGY51 + pCZGY3194	Expression vector	juEx5607
	pCZGY3188	Prgef-1-mcherry::rab-3	LR: pCZGY66 + pCZGY404	Expression vector	juEx5604, juEx5605, juEx5606, juEx5607
	pCZGY3174	Pmec-4-gfp1-10	LR: pCZGY553 + pCZGY2254	Expression vector	juEx5700, juIs438, juEx6997
	pCZGY2333	Pmec-4-tagRFP	LR: pCZGY553 + pCZGY2230	Expression vector	juEx5700, juIs438
	pCZGY3175	Pmec-4-rps-18(CDS)	LR: pCZGY553 + pCZGY3164	Expression vector	juEx5815
	pCZGY3195	Punc-25-gfp1-10	LR: pCZGY80 + pCZGY2254	Expression vector	juEx5515
	pCZGY405	Punc-25-mcherry::rab-3	LR: pCZGY80 + pCZGY404	Expression vector	juEx5515
	pCZGY3177	rpl-29::gfp	LR: pCZGY1030 + pCZGY3167	MosSCI vector	juSi123
	pCZGY3178	gfp::rps-18(gDNA)	LR: pCZGY1030 + pCZGY3162	MosSCI vector	juSi83
	pCZ946	gfp11::rps-18	gfp::rps-18 was inserted into pCFJ151 using BsiWI and AvrII sites	MosSCI vector	juSi94
