# Supplementary material for: Microtubule-dependent ribosome localization in C. elegans neurons
Source: eLife. 2017 Aug 2;6:e26376. doi: 10.7554/eLife.26376 (PMC5577916; doi:10.7554/eLife.26376)
Supplement: Supplementary file 3. [file elife-26376-supp3.xlsx]

## Sheet: TableS3_Primer
	Table S3 Primer list
	Primer #	Sequence	Gene	Note
	YJ7758	ccctctactcaatttcagcaaaaa	rps-18
	YJ7759	tctttaataatgtttgcctcgatc	rps-18
	YJ9801	AGATCTgccaccatggtgagcaagggcgaggagctg	gfp1-10	Uppercase: BglII
	YJ9803	GCTAGCCTGCAGaagatccagatccagatccagatc	gfp1-10	Uppercase: NheI and PstI
	YJ9227	accactctgcgtttgctgctc	rpl-29
	YJ9228	acgatcatcgccaactccttc	rpl-29
	YJ10126	gaaatccgcactggaaccta	mec-12
	YJ10127	tttctgccaataggctttgaa	mec-12
	YJ11867	agaggaagaaacgtcgggtc	mec-7
	YJ12057	agtgacgccgctcattgtg	mec-7
	YJ12114	taaaatcacgacaagatgAGATCTttCTGCAGgttcgttgatcattccggag	rps-18	Uppercase: BglII and PstI
	YJ12115	ctccggaatgatcaacgaacCTGCAGaaAGATCTcatcttgtcgtgatttta	rps-18	Uppercase: PstI and BglII
	YJ12116	atggccaagtccaagaaccac	rpl-29
	YJ12117	ggccttggactcgacggactt	rpl-29
	YJ12118	atgtccgaagaaccagtcgca	ife-2
	YJ12119	agtggctggtgtggcagg	ife-2
	YJ12120	atggaagctgaaacgtcaact	ife-4
	YJ12121	tttgcagatatttttagtagtatgacga	ife-4
	YJ12122	atgtcgttgatcattccggag	rps-18
	YJ12123	ttatcctcccttcttcttgga	rps-18
	YJ12124	CGTACGccctctactcaatttcagcaaaaa	rps-18	Uppercase: BsiWI
	YJ12125	CCTAGGtctttaataatgtttgcctcgatc	rps-18	Uppercase: AvrII
	YJ12128	atgcaggctgtatttgaaaca	stau-1
	YJ12129	tgtcttgctcgctgagagctc	stau-1
	YJ12130	atggagagtctcgcaaaaaac	ain-1
	YJ12131	ttctaagaacgagtagtgatagtcc	ain-1
	YJ12134	accttcaccttgaaacgctg	mec-12
	YJ12135	tggaggccgttggaacaag	mec-12
	YJ12136	ccagtgatcgcctgctaag	mec-7
	YJ12137	cagatgggtcaatgccgtg	mec-7
	YJ11668	atgacaaatgctcaaccaacgg	mec-15
	YJ11669	gctccaaagacgaatagttcga	mec-15
	YJ12138	gctacatttagatgctgggtg	mec-15
	YJ12139	aaatgagccacgcagcac	mec-15
