# Supplementary figures and images for: Microtubule-dependent ribosome localization in C. elegans neurons
Source: eLife journal article supplement (doi:10.7554/elife.26376), 2017-08-02

Figure 1-figure supplement 1

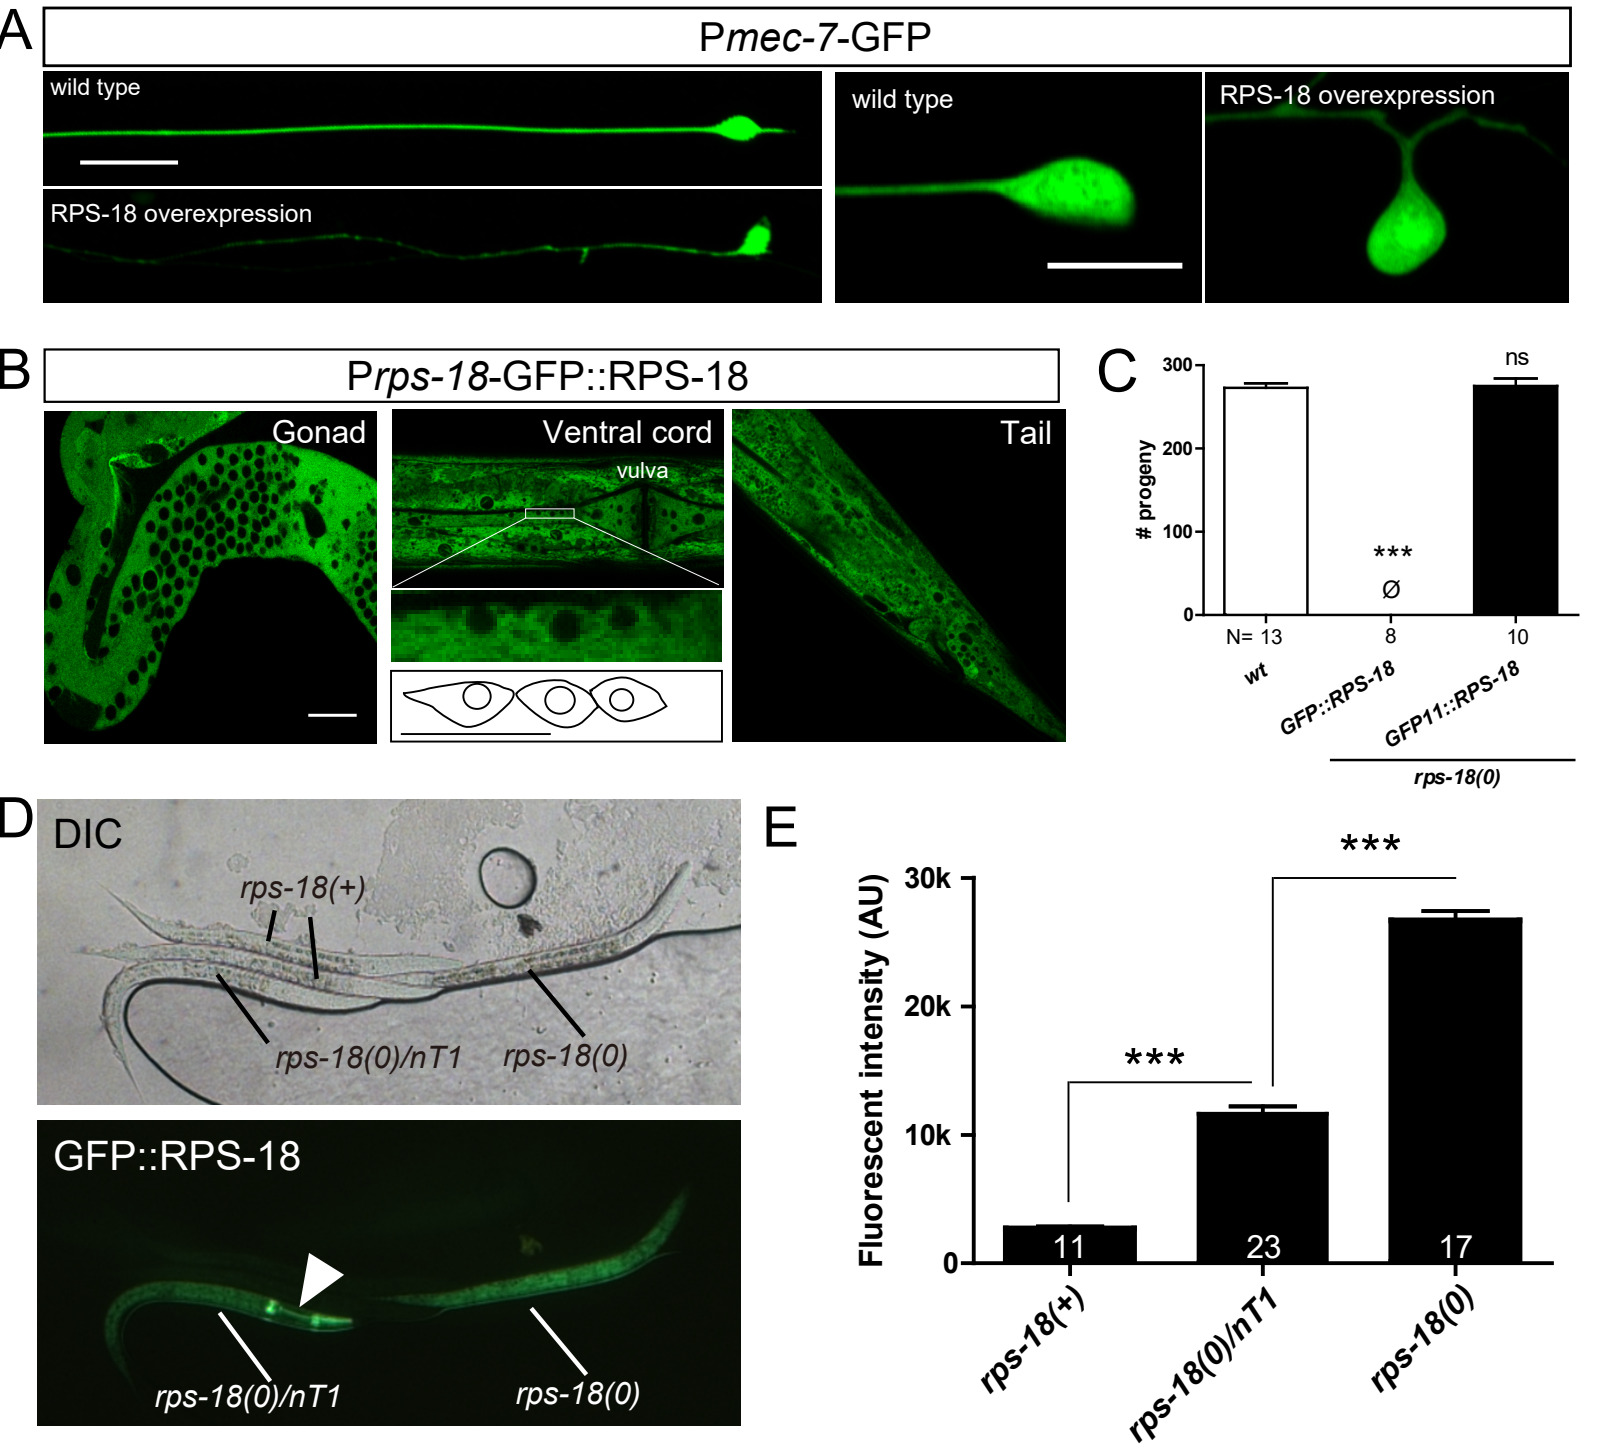

Supplement: supp [file elife_poa_e26376_Figure_1_figure_supplement_1.pdf › elife_poa_e26376_Figure_1_figure_supplement_1.pdf]

Figure 1-figure supplement 2

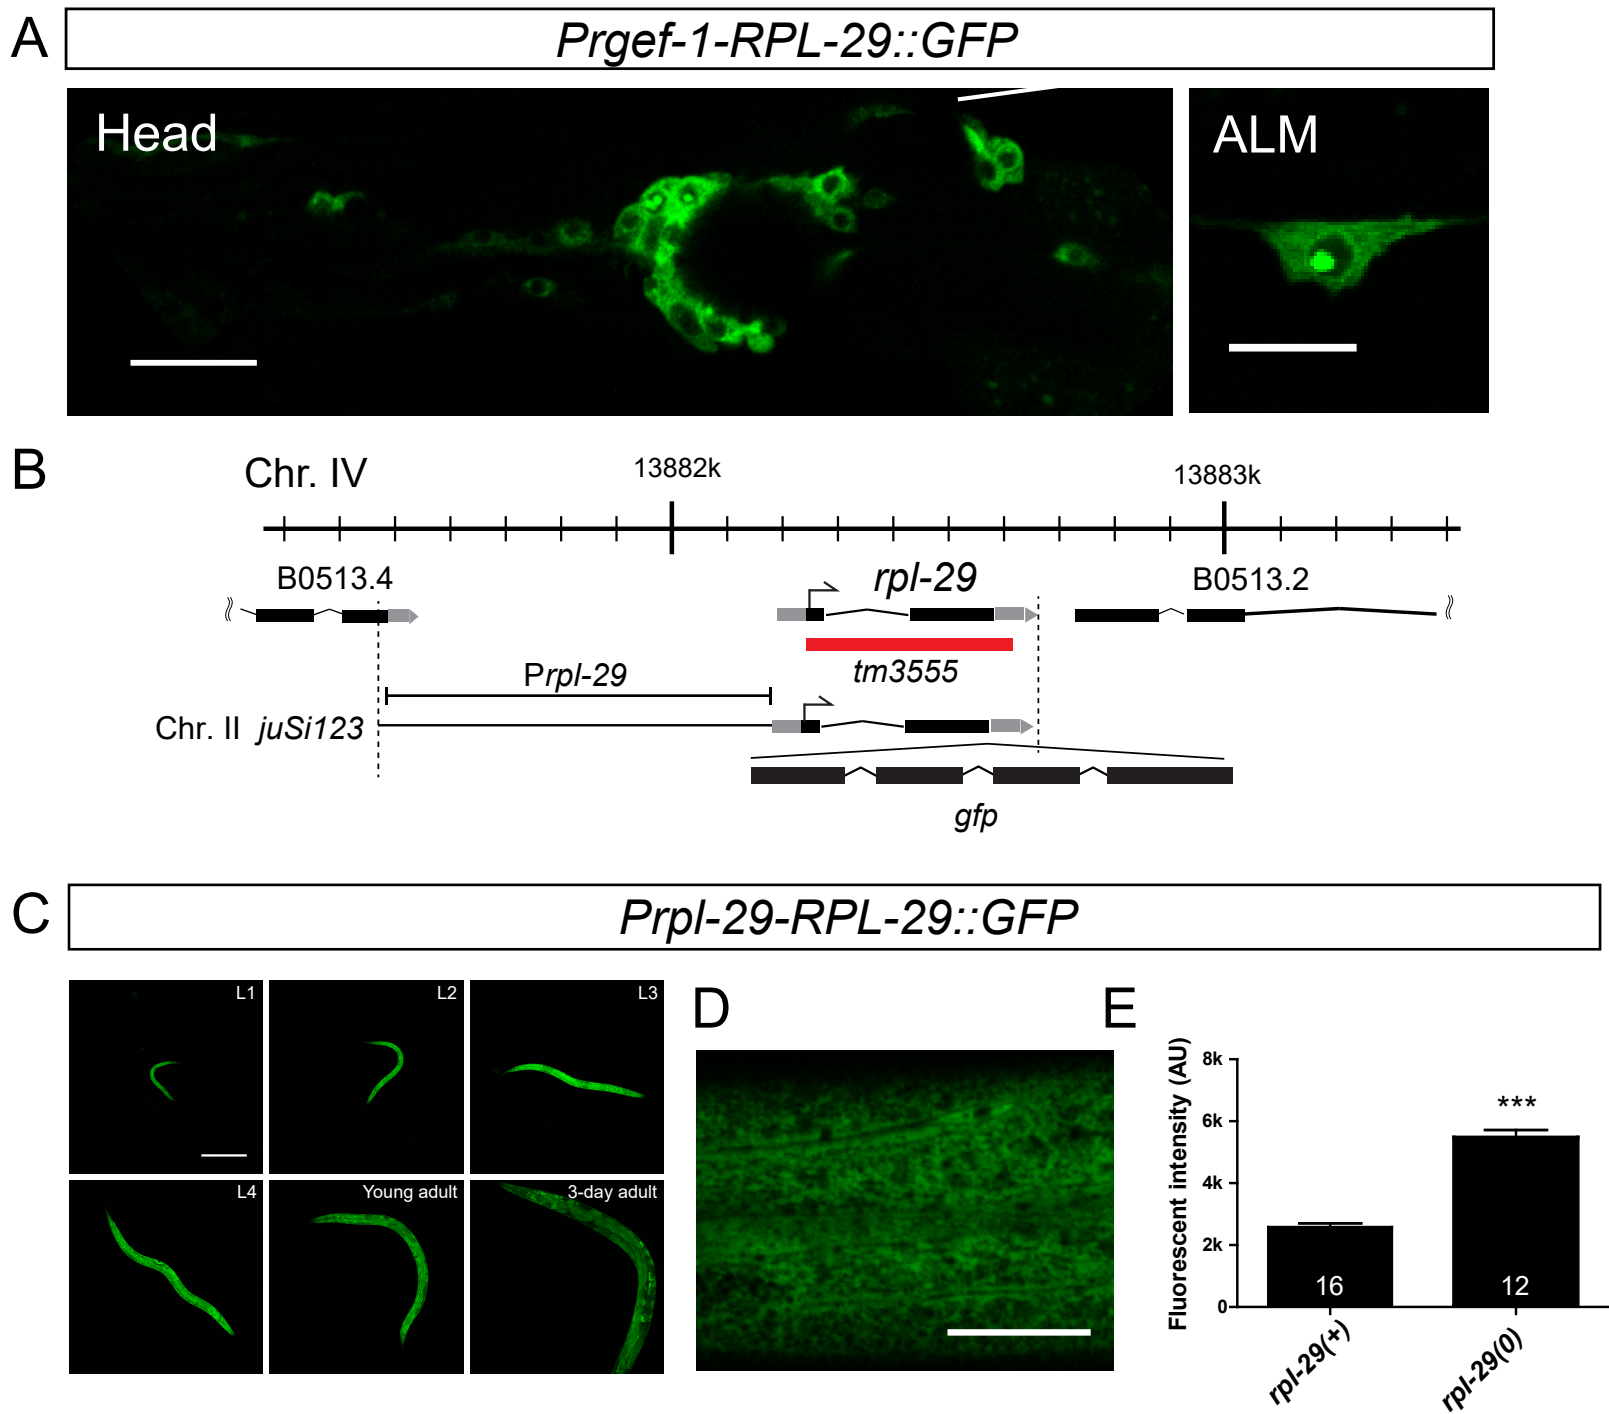

Supplement: supp [file elife_poa_e26376_Figure_1_figure_supplement_2.pdf › elife_poa_e26376_Figure_1_figure_supplement_2.pdf]

Figure 1-figure supplement 3

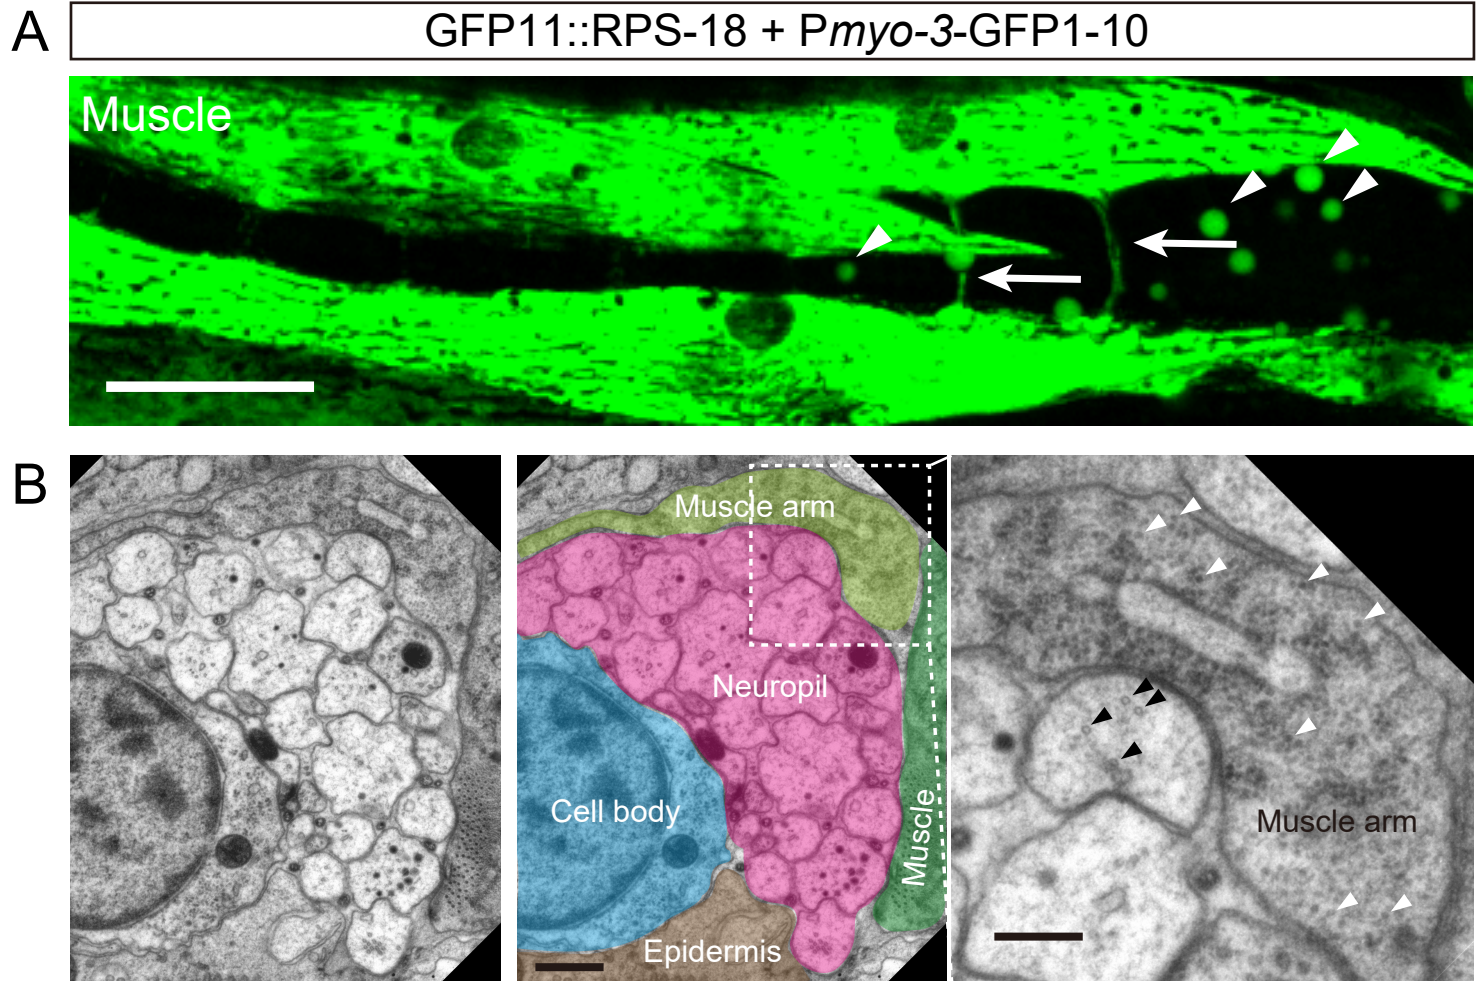

Supplement: supp [file elife_poa_e26376_Figure_1_figure_supplement_3.pdf › elife_poa_e26376_Figure_1_figure_supplement_3.pdf]

Figure 5-figure supplement 1

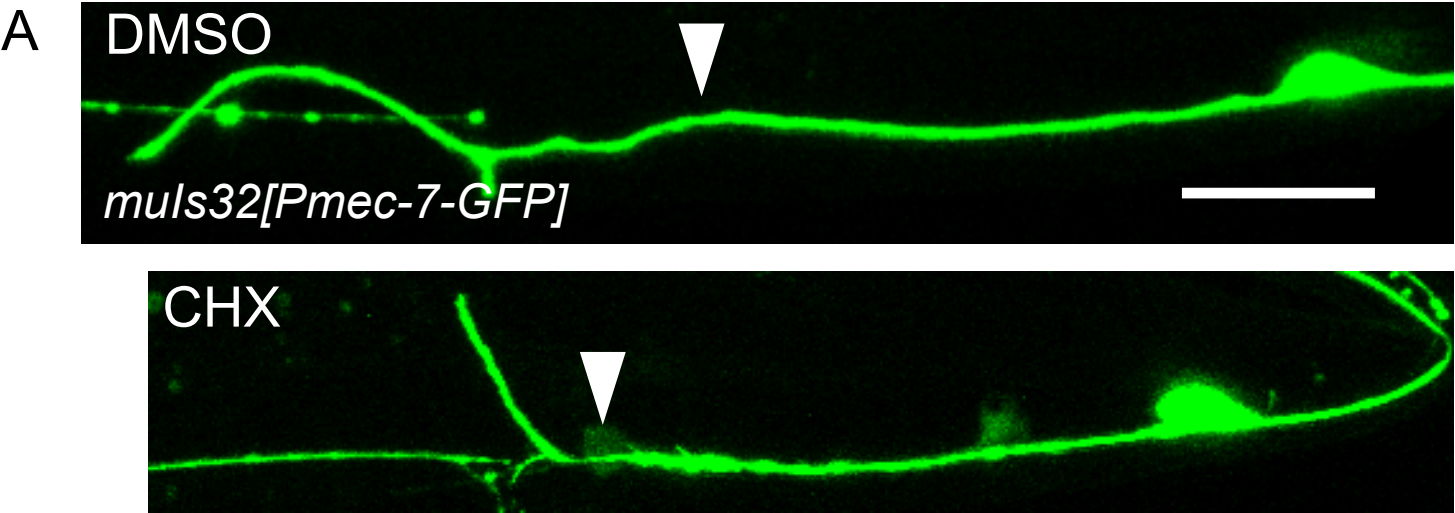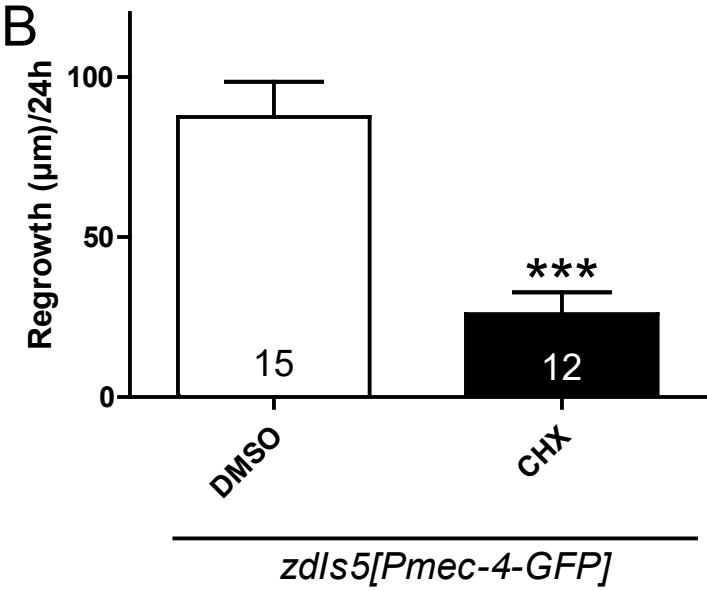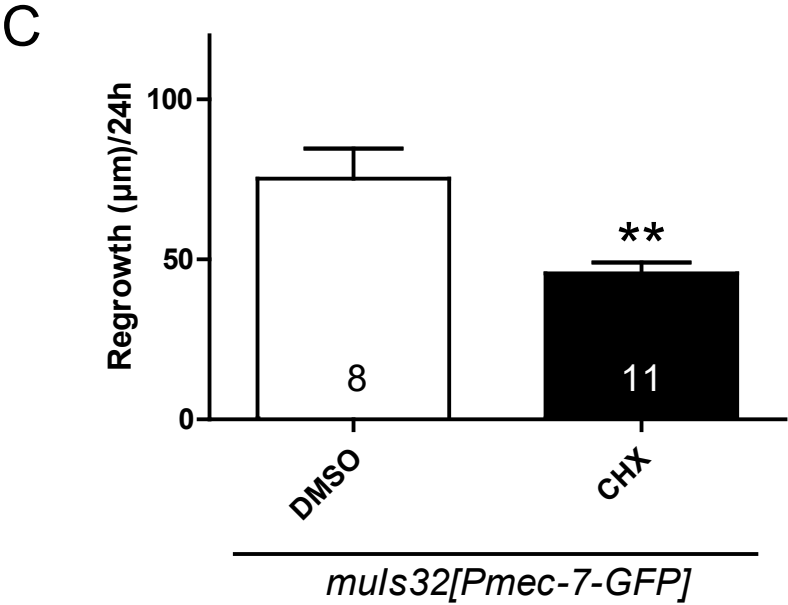

Supplement: supp [file elife_poa_e26376_Figure_5_figure_supplement_1.pdf › elife_poa_e26376_Figure_5_figure_supplement_1.pdf]

Figure 7-figure supplement 1

A *mec-7*

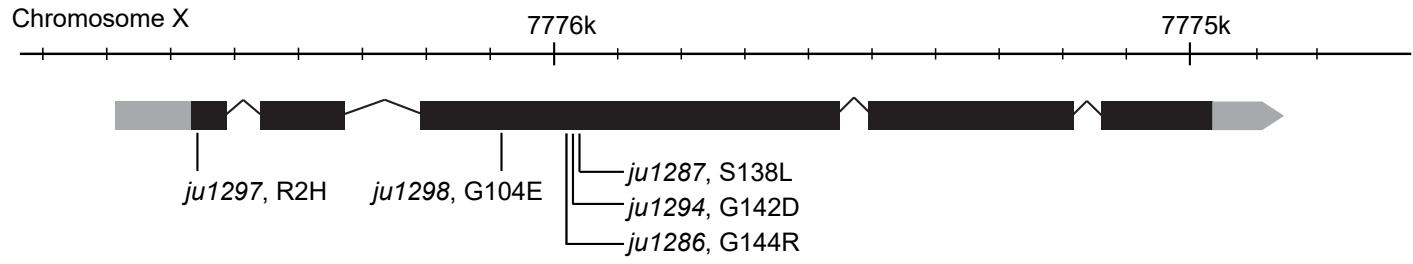

B *mec-12*

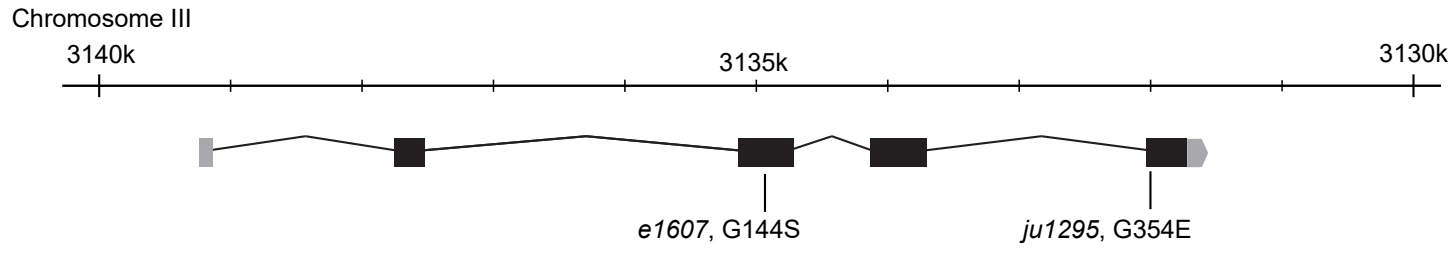

C *mec-15*

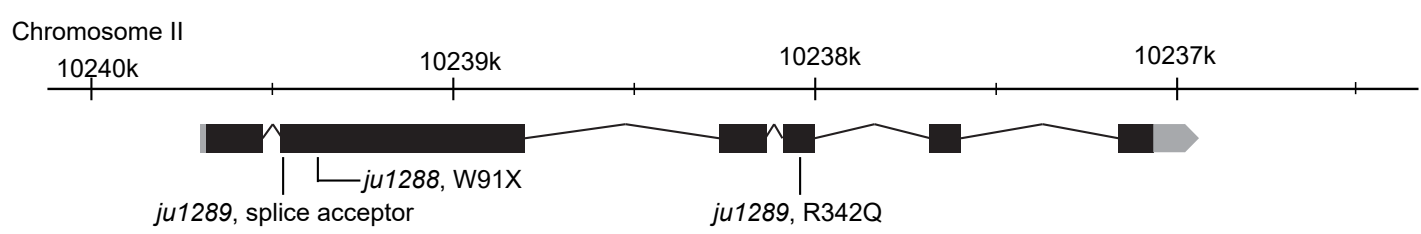

D

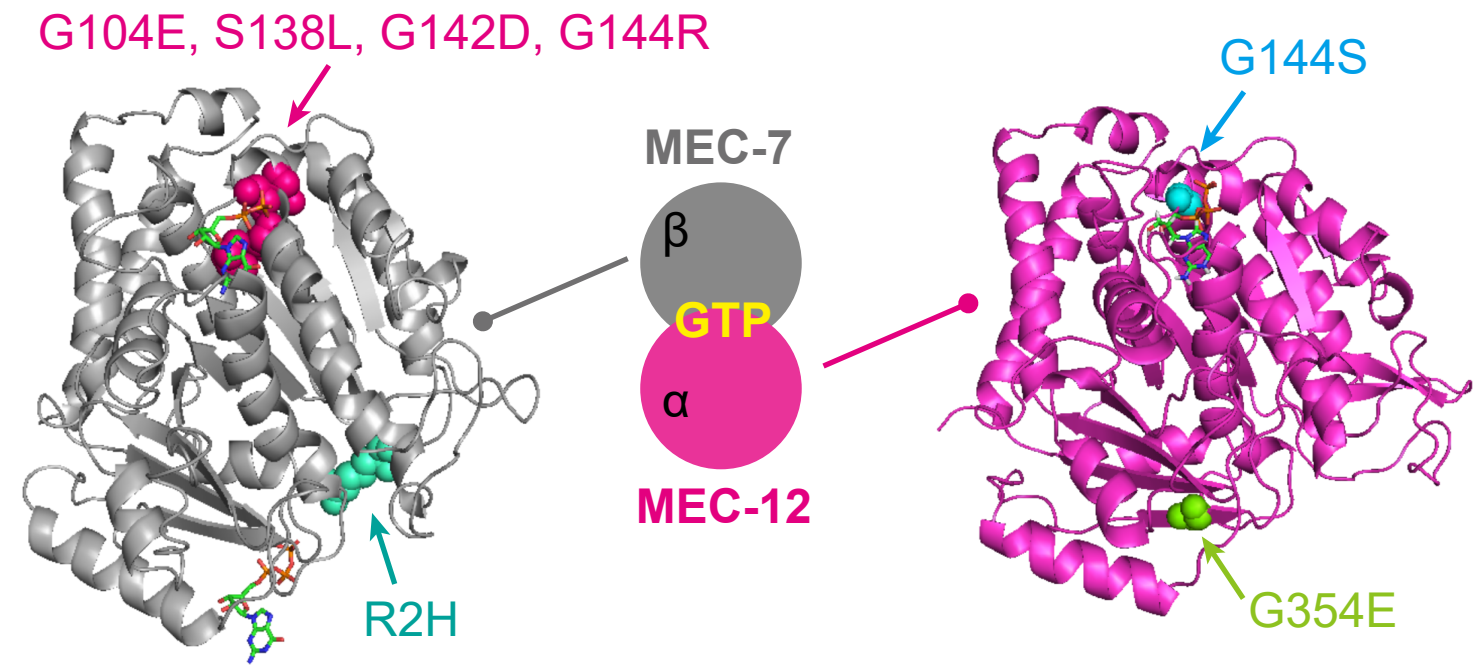

Supplement: supp [file elife_poa_e26376_Figure_7_figure_supplement_1.pdf › elife_poa_e26376_Figure_7_figure_supplement_1.pdf]

Figure 7-figure supplement 2

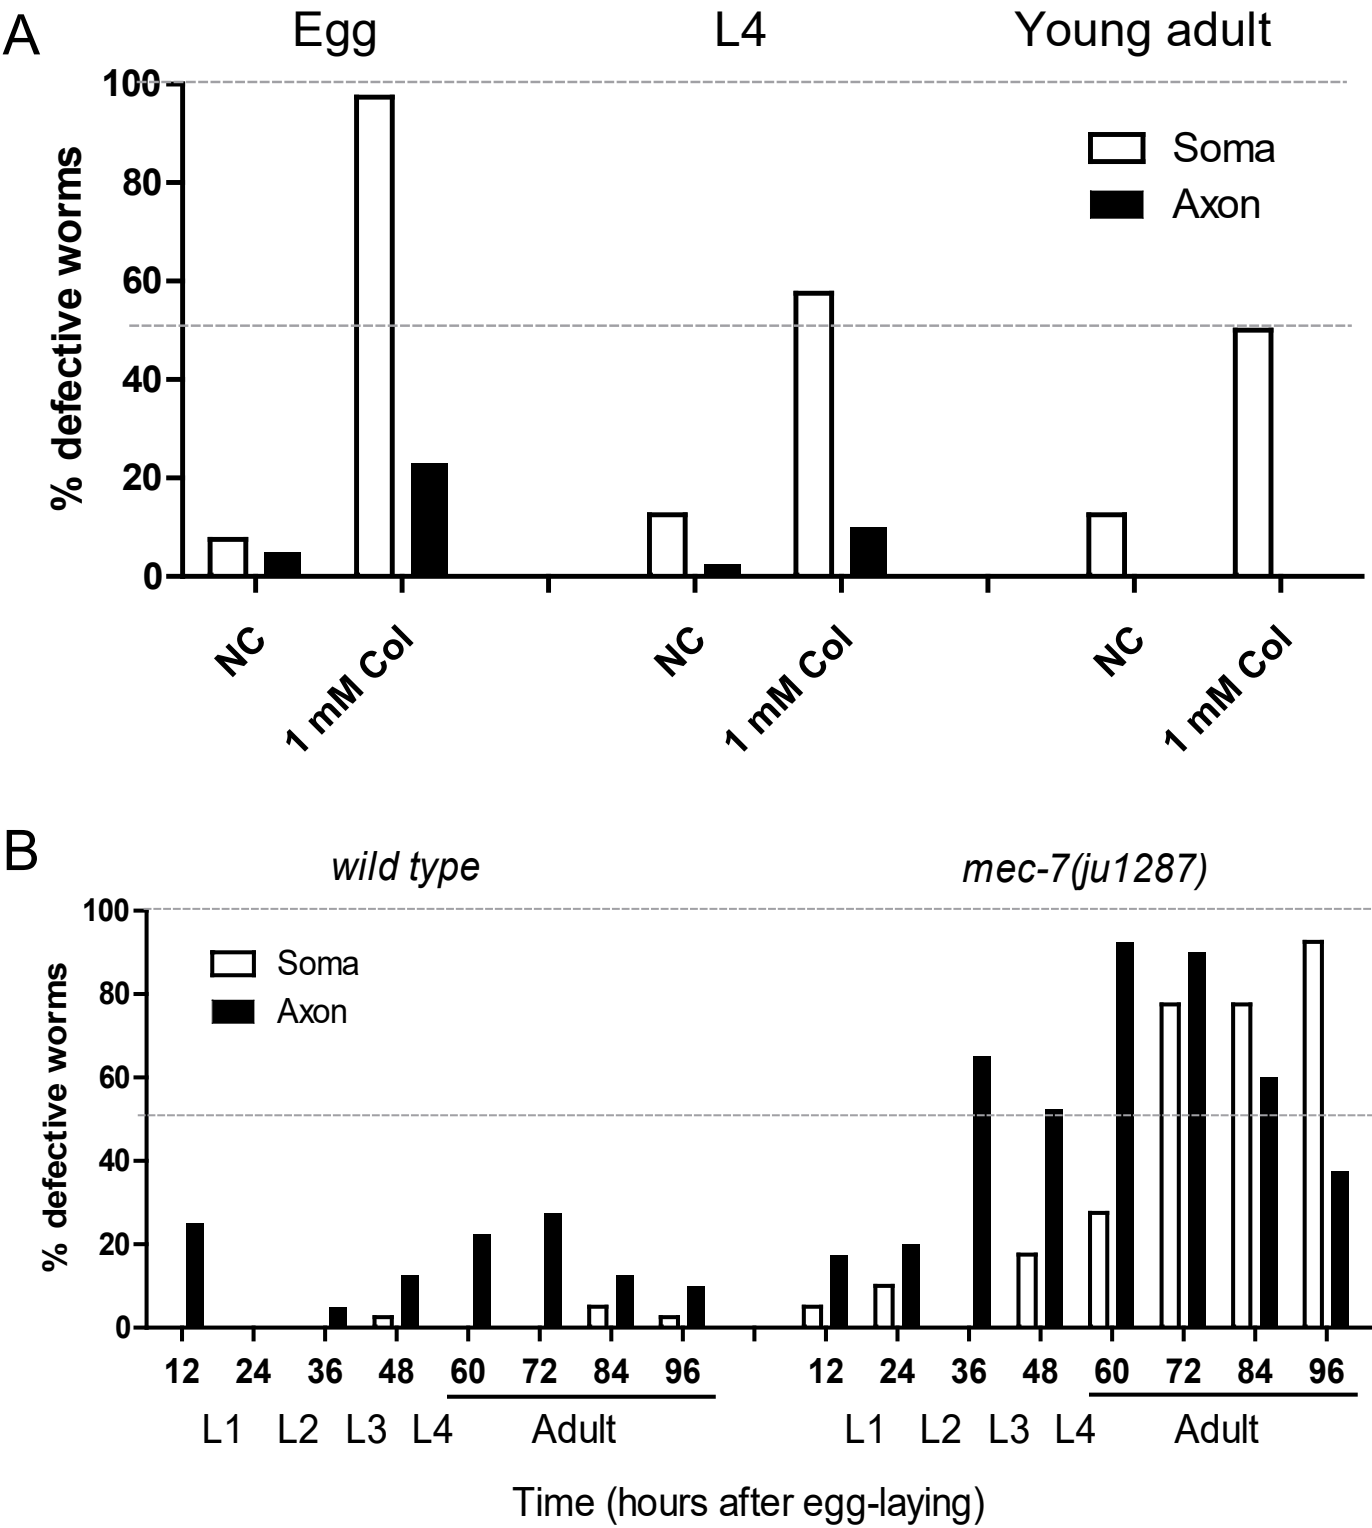

Supplement: supp [file elife_poa_e26376_Figure_7_figure_supplement_2.pdf › elife_poa_e26376_Figure_7_figure_supplement_2.pdf]
